# Supplementary material
Source: PubMed Central journal article supplement (PMC2700987)
Supplement: 0811321106_0811321106SI.pdf [file 0811321106_0811321106SI.pdf]

# Supporting Information

Cybulski et al. 10.1073/pnas.0811321106

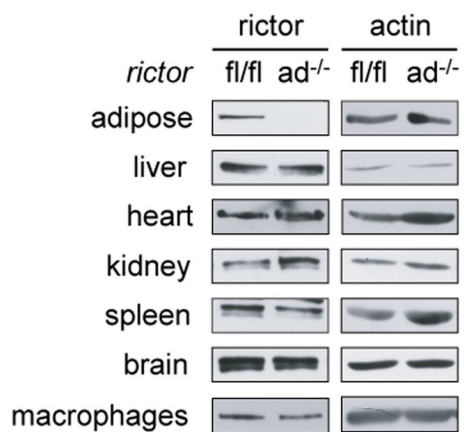

Fig. S1. Immunoblot showing specific knockout of *rictor* in adipose tissue but not in other tissue examined.

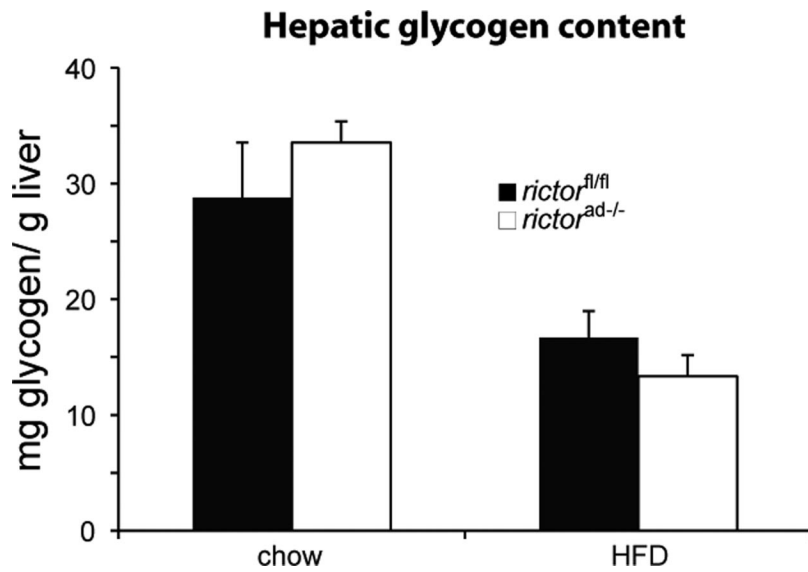

**Fig. S2.** Quantification of hepatic glycogen content in *rictor<sup>ad-/-</sup>* and *rictor<sup>fl/fl</sup>* mice fed a chow diet ( $n = 4$  per group) or an HFD for 10 weeks ( $n = 10$  per group). A small piece of frozen liver tissue was dissolved at 95 °C for 30 min in 0.3 mL 0.5 M KOH. A total of 25  $\mu$ L of 6% Na<sub>2</sub>SO<sub>4</sub> and 750  $\mu$ L 100% MeOH were added to cooled samples. Samples were incubated for 1 h at -80 °C and centrifuged at 14,000 rpm at 4 °C for 5 min. A total of 200  $\mu$ L of 2 mg/mL amyloglucosidase in 0.2 M sodium acetate buffer (pH 4.9) was added to the pellet for 60 min of incubation at 37 °C. For glucose assays, 10  $\mu$ L of sample was used (GAHK-20 Kit; Sigma). Glycogen standard curve was prepared using glycogen (G1767; Sigma) dissolved in 0.5 M KOH.

## glucose tolerance (chow)

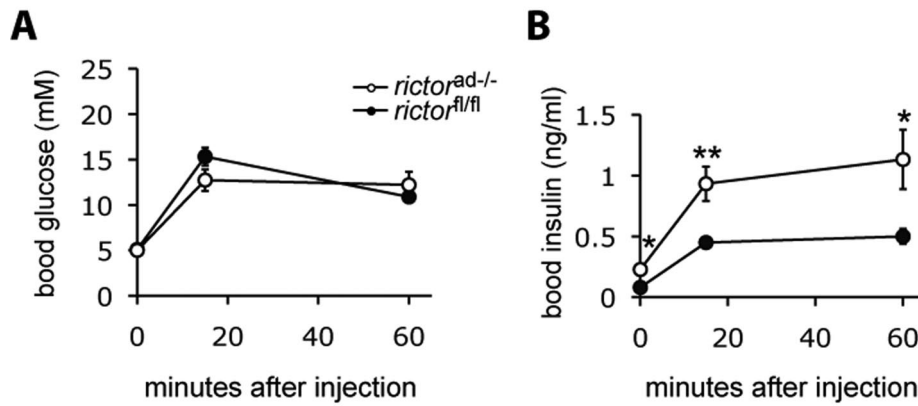

## glucose tolerance (HFD)

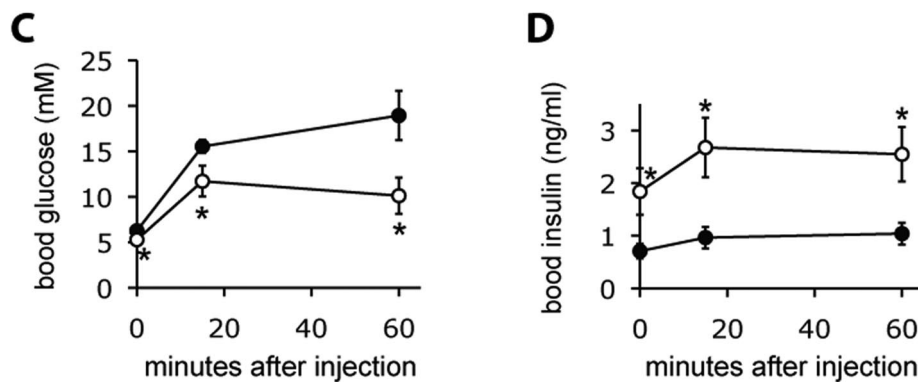

**Fig. S3.** Glucose tolerance test in mice fed a chow diet (A and B) or HFD for 10 weeks (C and D). Mice were injected with glucose (2 g/kg, i.p.), and blood glucose (A and C) and insulin (B and D) were simultaneously measured at the indicated time points. \* $P < 0.05$ , \*\* $P < 0.01$ , *rictor<sup>ad-/-</sup>* vs. *rictor<sup>fl/fl</sup>*.  $n = 9-10$  per group.
